# Supplementary material
Source: PubMed Central journal article supplement (PMC1785411)
Supplement: plntcell_tpc.106.046227_2.pdf [file plntcell_tpc.106.046227_2.pdf]

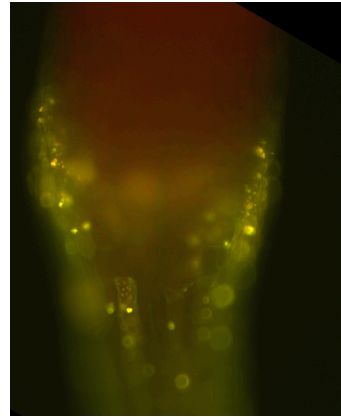

A. control petunia  
DPBA stained  
Root-shoot junction

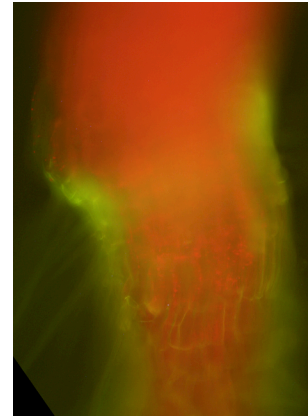

B. RNAi petunia  
DPBA stained  
Root-shoot junction

**Supplemental Figure 2.** Flavonoid fluorescence in 5-day old control (A) and *BPBT* RNAi-10 (B) petunia seedlings stained with diphenylboric acid 2-aminoethyl ester (DPBA). Quercetin fluorescence is yellow-orange. Chlorophyll autofluorescence is red. Control seedlings accumulate quercetin at the root-shoot junction (A). *BPBT* RNAi-10 seedlings do not accumulate quercetin at the root-shoot junction (B).
